# Supplementary material
Source: PubMed Central journal article supplement (PMC5798874)
Supplement: NIHMS936955-supplement-supplement_1.pdf [file NIHMS936955-supplement-supplement_1.pdf]

## Appendix A.1

**TABLE A.1 Cognitive function score and sub-scales by sex and age subgroup**

|                                                                                                    | Women by Age                  |                             |                             | Men by Age           |                      |                      |
|----------------------------------------------------------------------------------------------------|-------------------------------|-----------------------------|-----------------------------|----------------------|----------------------|----------------------|
|                                                                                                    | 45-54                         | 55-64                       | ≥ 65                        | 45-54                | 55-64                | ≥ 65                 |
|                                                                                                    | Mean cognitive score (95% CI) |                             |                             |                      |                      |                      |
| Cognitive function overall score                                                                   | <b>1.5</b><br>(1.3, 1.7)      | <b>0.2</b><br>(-0.1, 0.5)   | <b>-1.2</b><br>(-1.6, -0.9) | 0.2<br>(0.0, 0.4)    | -0.9<br>(-1.3, -0.6) | -2.1<br>(-2.6, -1.7) |
| Word Fluency                                                                                       | 2.6<br>(2.5, 2.6)             | 2.5<br>(2.4, 2.6)           | 2.3<br>(2.2, 2.5)           | 2.5<br>(2.4, 2.6)    | 2.4<br>(2.3, 2.5)    | 2.4<br>(2.2, 2.6)    |
| Digit Symbol Substitution Test                                                                     | <b>3.0</b><br>(2.9, 3.0)      | 2.4<br>(2.3, 2.5)           | 1.9<br>(1.8, 2.0)           | 2.8<br>(2.7, 2.9)    | 2.3<br>(2.2, 2.4)    | 1.9<br>(1.7, 2.0)    |
| SEVLT Sum 3 Trials                                                                                 | <b>24.9</b><br>(24.6, 25.3)   | <b>23.4</b><br>(22.9, 23.8) | <b>21.4</b><br>(20.8, 22.0) | 22.5<br>(22.1, 22.9) | 20.9<br>(20.4, 21.4) | 19.1<br>(18.4, 19.8) |
| SEVLT Free Recall                                                                                  | <b>9.3</b><br>(9.1, 9.4)      | <b>8.5</b><br>(8.3, 8.7)    | <b>7.5</b><br>(7.2, 7.8)    | 8.1<br>(7.9, 8.3)    | 7.4<br>(7.1, 7.6)    | 6.4<br>(6.1, 6.8)    |
| NOTE: All differences by age are statistically significant (P<0.05) except for Word Fluency in men |                               |                             |                             |                      |                      |                      |
| <b>Bold</b> values are significantly higher in women than in men (P<0.05)                          |                               |                             |                             |                      |                      |                      |

## Appendix A.2

**FIGURE A.1 Group-specific estimates for the association between MVPA and cognitive measures among Hispanic/Latino adults**

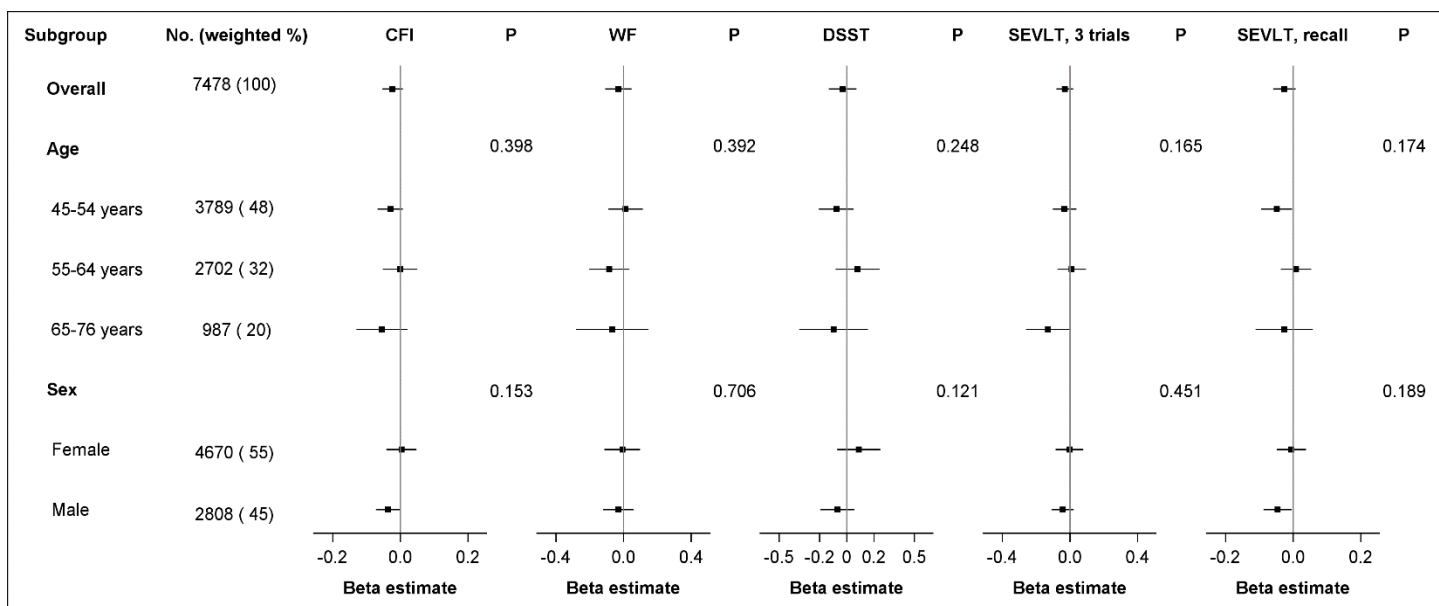

Footnote: Betas (95% CI) are plotted by background group and represent the mean change in dependent variable for each 60-minute/day increase in sedentary behavior, derived from separate linear regression models for each interaction tested; P-values test for heterogeneity in the association between sedentary behavior and each outcome across subgroups; final models presented are adjusted for age, sex, years of education, Hispanic/Latino background, field center, employment status, annual household income, and self-reported physical health. Abbreviations: CFI: cognitive function index; WF: word fluency; DSST: Digit Symbol Substitution Test, SEVLT: Spanish English Verbal Learning Test.
